# Supplementary material for: Demand and Supply Side Barriers that Limit the Uptake of Nutrition Services among Pregnant Women from Rural Ethiopia: An Exploratory Qualitative Study
Source: PubMed Central journal article supplement (PMC6267174; doi:10.3390/nu10111687), 2018-11-05
Supplement: nutrients-10-01687-s001.pdf [file nutrients-10-01687-s001.pdf]

## Appendix: Supplementary materials

Table S1. A sample of some of the questions posed to participants during the interviews and focus group discussions.

| Serial Number | Questions                                                                                                    |
|---------------|--------------------------------------------------------------------------------------------------------------|
| 1             | What are the common nutrition problems in the community for pregnant women?                                  |
| 2             | What pregnant women nutrition interventions are the priorities in this community?                            |
| 3             | How do you perceive/evaluate the priority given for nutrition interventions during pregnancy?                |
| 4             | What interventions for pregnant women are being implemented in an effective way?                             |
| 5             | What are the challenges to implement delivering nutrition interventions for pregnant women?                  |
| 6             | What are the perceived needs of nutrition services during pregnancy?                                         |
| 7             | How aware and interested are the pregnant women on the need to utilize the nutrition interventions/services? |
| 8             | What community related beliefs and norms are preventing access to nutrition interventions?                   |
| 9             | How convenient are the nutrition services for pregnant women?                                                |
| 10            | How do you judge the commitment of the nutrition services providers during pregnancy?                        |
| 11            | What would be the best way to get nutrition information to pregnant women?                                   |
| 12            | Who should provide nutrition information during pregnancy? Why?                                              |
